# Supplementary material for: In situ exsolved FeNi3 nanoparticles on nickel doped Sr2Fe1.5Mo0.5O6−δ perovskite for efficient electrochemical CO2 reduction reaction
Source: Royal Society of Chemistry journal article supplement (doi:10.1039/c9ta03065d), 2019-01-01
Supplement: c9ta03065d1.pdf [file c9ta03065d1.pdf]

## Supplementary Information

### ***In situ* exsolved FeNi<sub>3</sub> nanoparticles on nickel doped Sr<sub>2</sub>Fe<sub>1.5</sub>Mo<sub>0.5</sub>O<sub>6-δ</sub> perovskite for efficient electrochemical CO<sub>2</sub> reduction reaction**

Houfu Lv,<sup>a, b, c, ‡</sup> Le Lin,<sup>a, b, d, ‡</sup> Xiaomin Zhang,<sup>a, c</sup> Dunfeng Gao,<sup>a, c</sup> Yuefeng Song,<sup>a, b, c</sup> Yingjie Zhou,<sup>a, c</sup> Qingxue Liu,<sup>a, b, c</sup> Guoxiong Wang<sup>a, c\*</sup> and Xinhe Bao<sup>a, c\*</sup>

<sup>a</sup> State Key Laboratory of Catalysis, CAS Center for Excellence in Nanoscience, Dalian Institute of Chemical Physics, Chinese Academy of Sciences, Dalian, 116023, China

<sup>b</sup> University of Chinese Academy of Sciences, Beijing, 100039, China

<sup>c</sup> Dalian National Laboratory for Clean Energy, Dalian Institute of Chemical Physics, Chinese Academy of Sciences, Dalian, 116023, China

<sup>d</sup> School of Physical Science and Technology, ShanghaiTech University, Shanghai, 201210, China

<sup>‡</sup> These authors have contributed equally to this work.

\*Email: wanggx@dicp.ac.cn, xhbao@dicp.ac.cn.

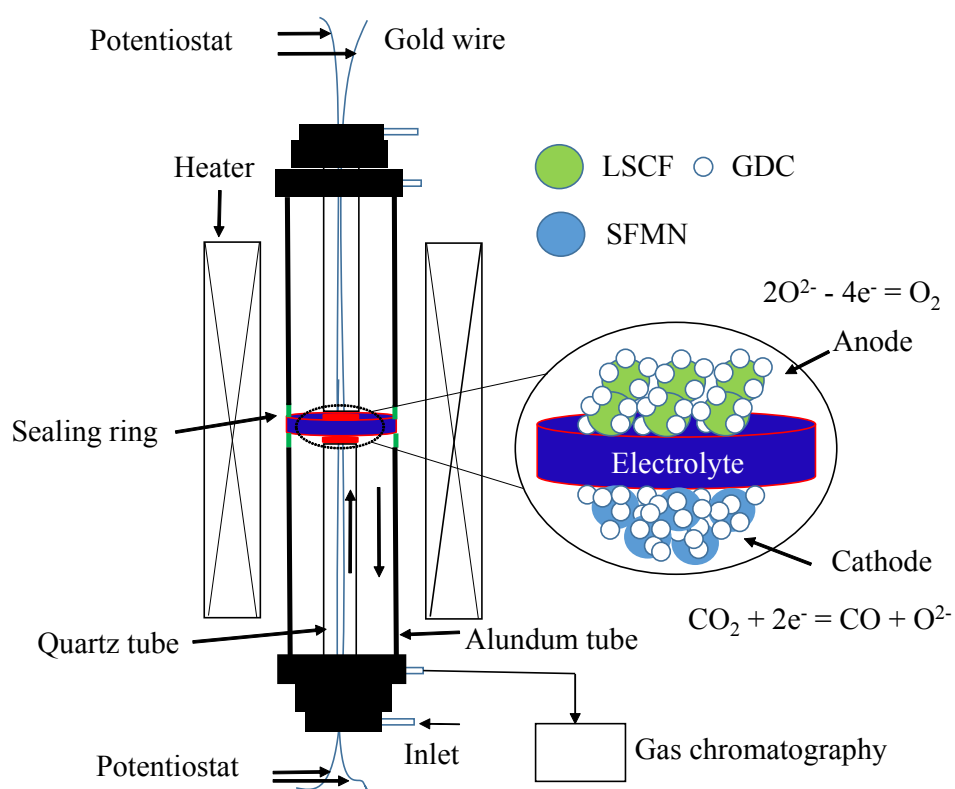

**Figure S1.** Schematic diagram of the SOEC testing device.

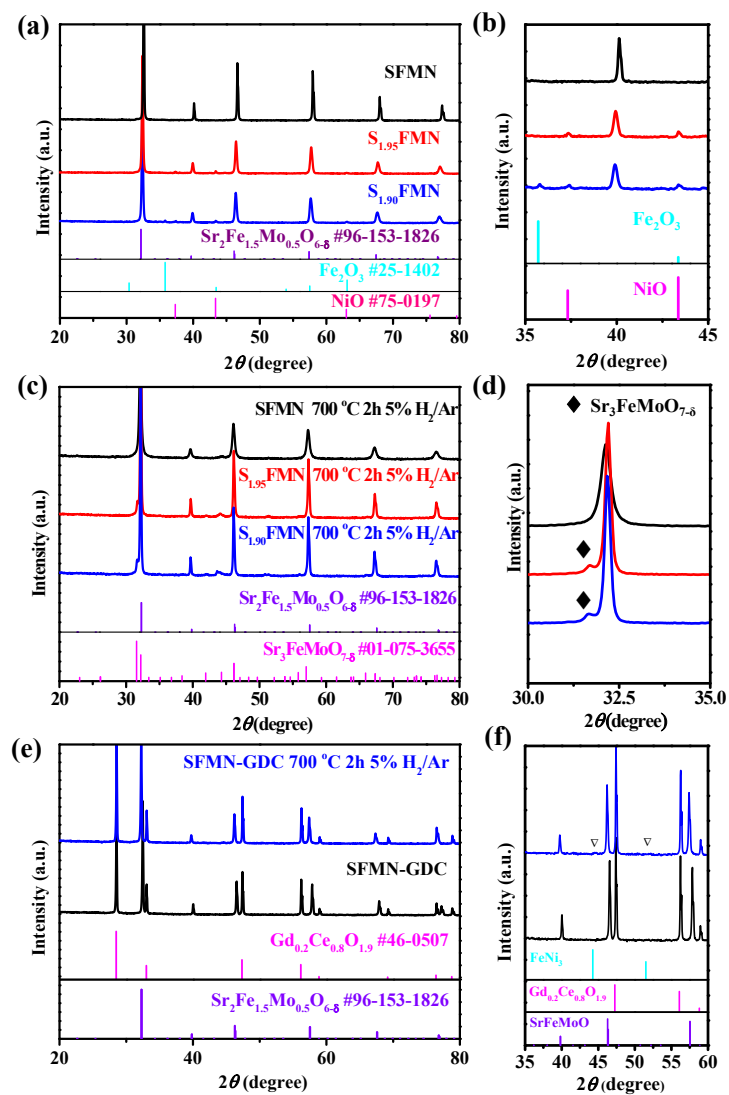

**Figure S2.** (a) XRD patterns of SFMN,  $S_{1.95}$ FMN and  $S_{1.90}$ FMN. (b) The enlarged XRD patterns of 35-45° of (a). (c) XRD patterns of SFMN,  $S_{1.95}$ FMN and  $S_{1.90}$ FMN after reduction treatment in 5 %  $\text{H}_2/\text{Ar}$  at 700 °C for 2 h. (d) The enlarged XRD patterns at 35-45° of (c). (e) XRD patterns of SFMN-GDC and SFMN-GDC after reduction treatment in 5 %  $\text{H}_2/\text{Ar}$  at 700 °C for 2 h. (f) The enlarged XRD patterns at 35-60° of (e)

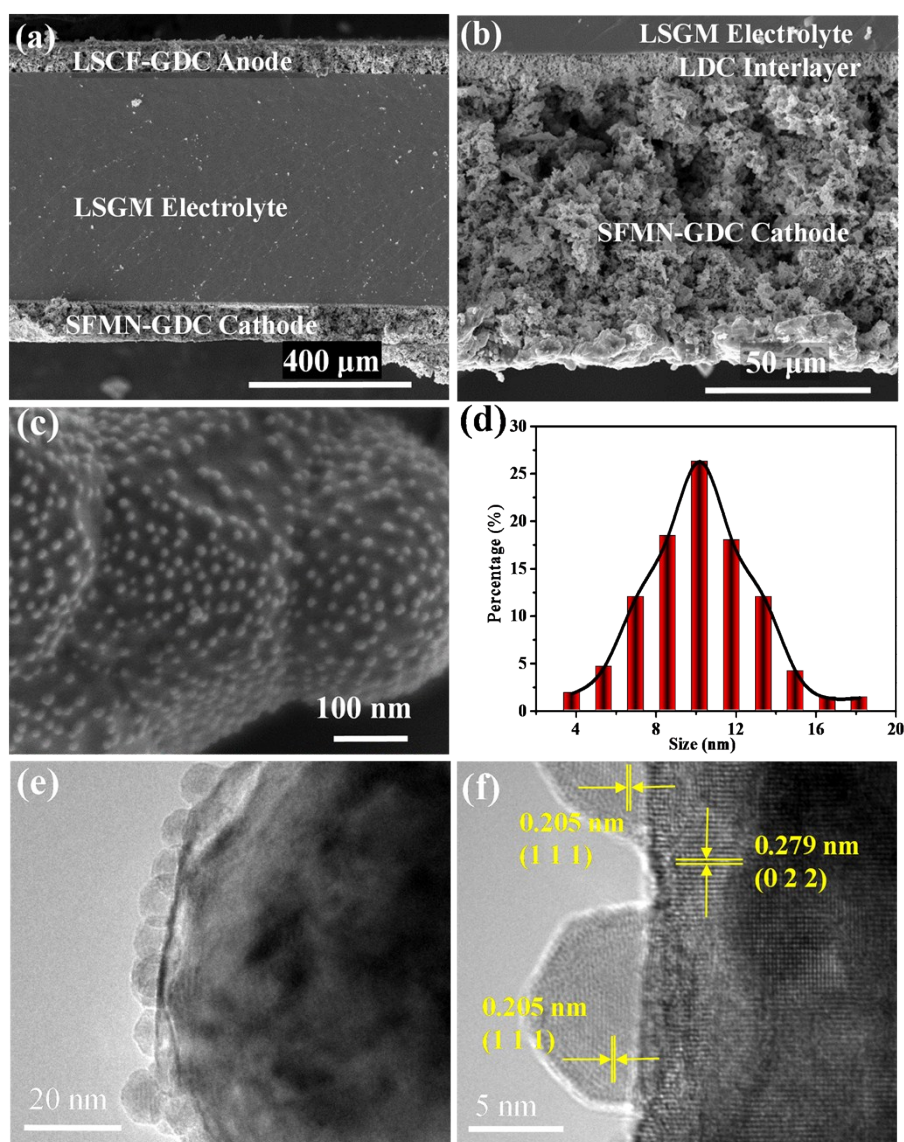

**Figure S3.** (a) Cross-sectional SEM images of the SFMN-GDC|LDC|LSGM|LSCF-GDC. (b) LSGM|LDC supported SFMN-GDC cathode. (c) SEM image of the FeNi<sub>3</sub>@SFMN. (d) Size distribution of FeNi<sub>3</sub> nanoparticles in FeNi<sub>3</sub>@SFMN. (e) High-resolution TEM image of FeNi<sub>3</sub>@SFMN. (f) The corresponding crystal lattice of FeNi<sub>3</sub> nanoparticles and the perovskite substrate.

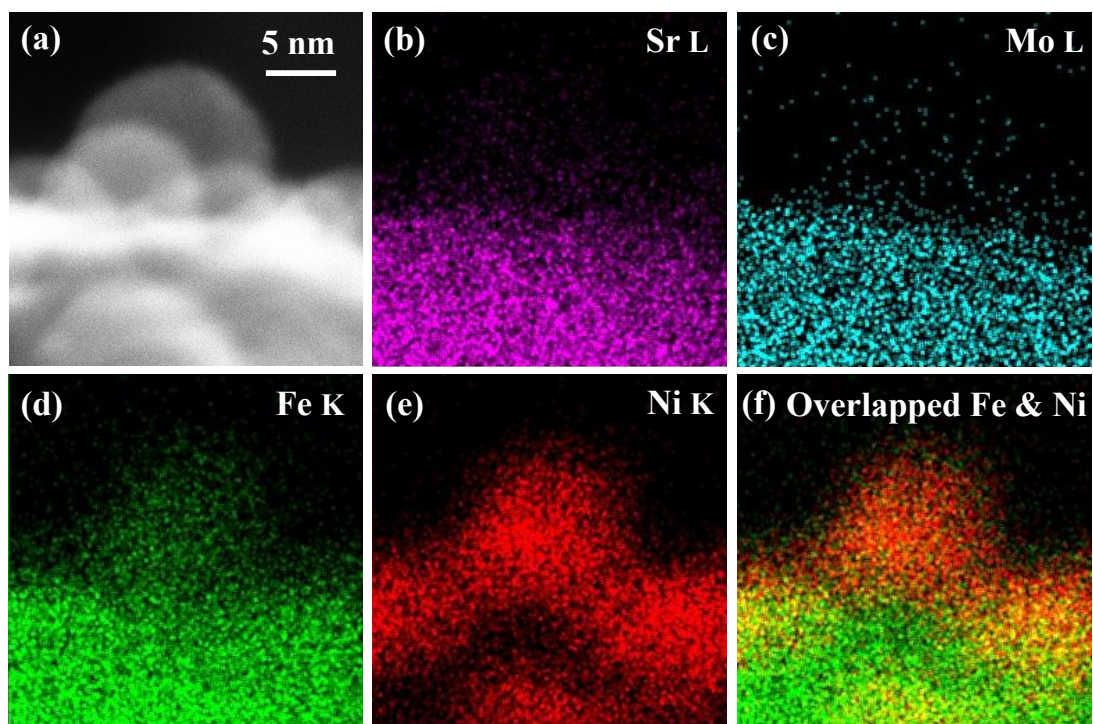

**Figure S4.** STEM image and element maps of FeNi<sub>3</sub>@SFMN. (a) STEM image, (b) Sr maps, (c) Mo maps, (d) Fe maps, (e) Ni maps and (f) overlapped Fe and Ni maps.

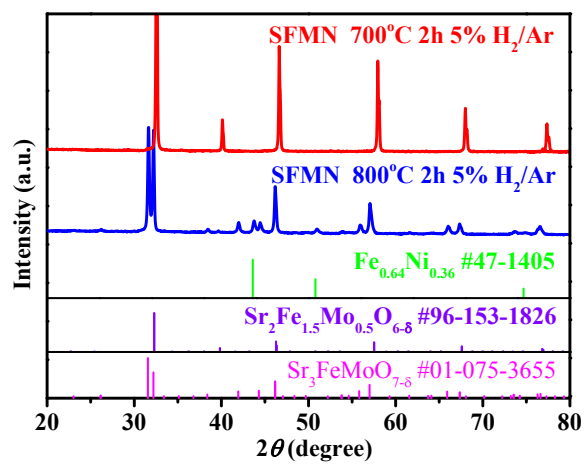

**Figure S5.** XRD patterns of SFMN after reduction treatment in 5 % H<sub>2</sub>/Ar for 2 h at 700 °C and 800 °C.

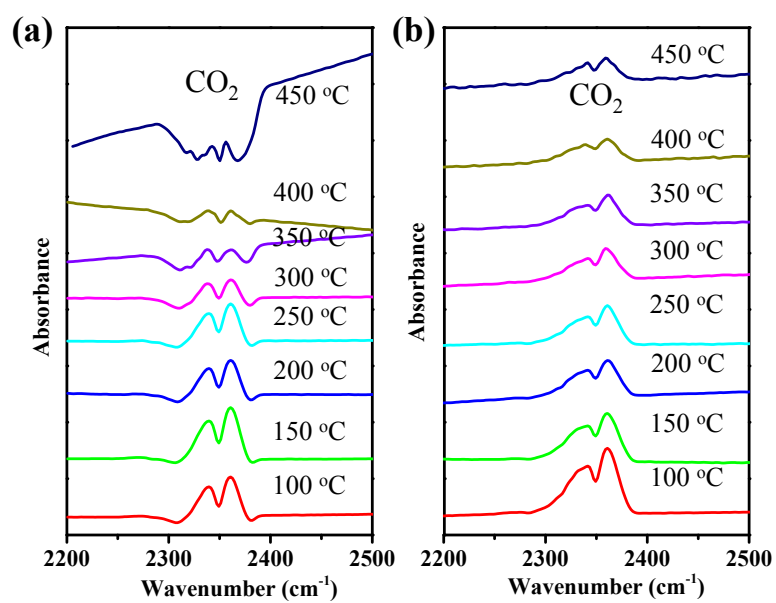

**Figure S6.** *Quasi in situ* FTIR spectroscopy of CO<sub>2</sub> adsorbed on SFMN (a) and FeNi<sub>3</sub>@SFMN (b) from 100-450 °C.

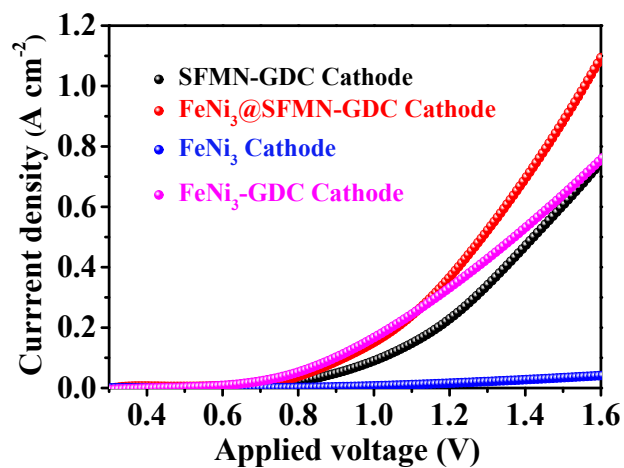

**Figure S7.** I-V curves of SOECs with SFMN-GDC, FeNi<sub>3</sub>@SFMN-GDC, FeNi<sub>3</sub> and FeNi<sub>3</sub>-GDC cathodes at 800 °C.

As for the individual FeNi<sub>3</sub> nanoparticles for CO<sub>2</sub>RR, we have tested the pure FeNi<sub>3</sub> and FeNi<sub>3</sub>-GDC (The mass ratio between Ni and GDC are the same for FeNi<sub>3</sub>-GDC and SFMN-GDC cathodes) as the cathodes at the same preparation and test conditions.

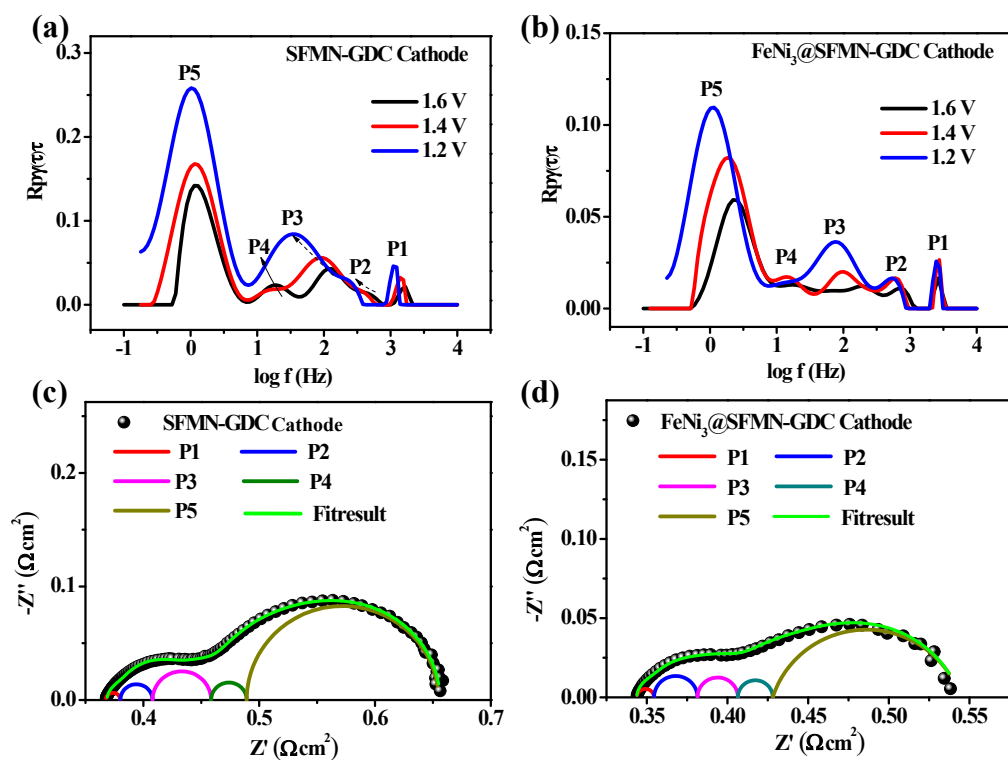

**Figure S8.** DRT plots of SOECs with SFMN-GDC (a) and FeNi<sub>3</sub>@SFMN-GDC cathodes (b) at various voltages and 800 °C. The resolved EIS results of SOECs with SFMN-GDC (c) and FeNi<sub>3</sub>@SFMN-GDC (d) cathodes at 1.6 V and 800 °C.

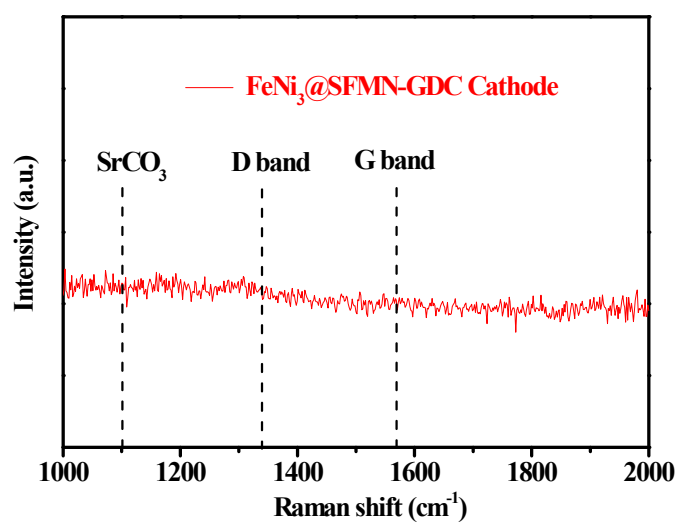

**Figure S9** Raman spectra of SOEC with FeNi<sub>3</sub>@SFMN-GDC cathode after the stability test.

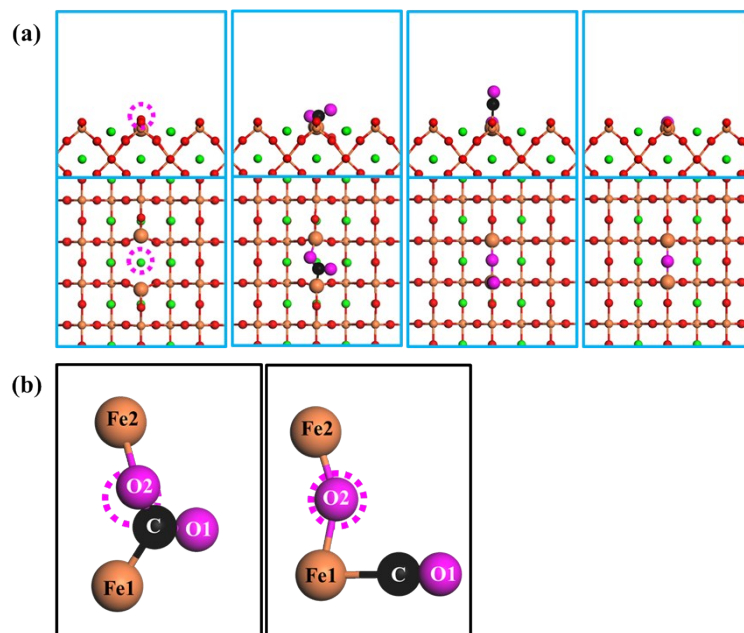

**Figure S10.** DFT calculation results. (a) Optimized geometry structures of the CO<sub>2</sub>RR to CO process over the SFO surface. (b) The local enlarged configurations of CO<sub>2</sub>\* and CO\* over the SFO model.

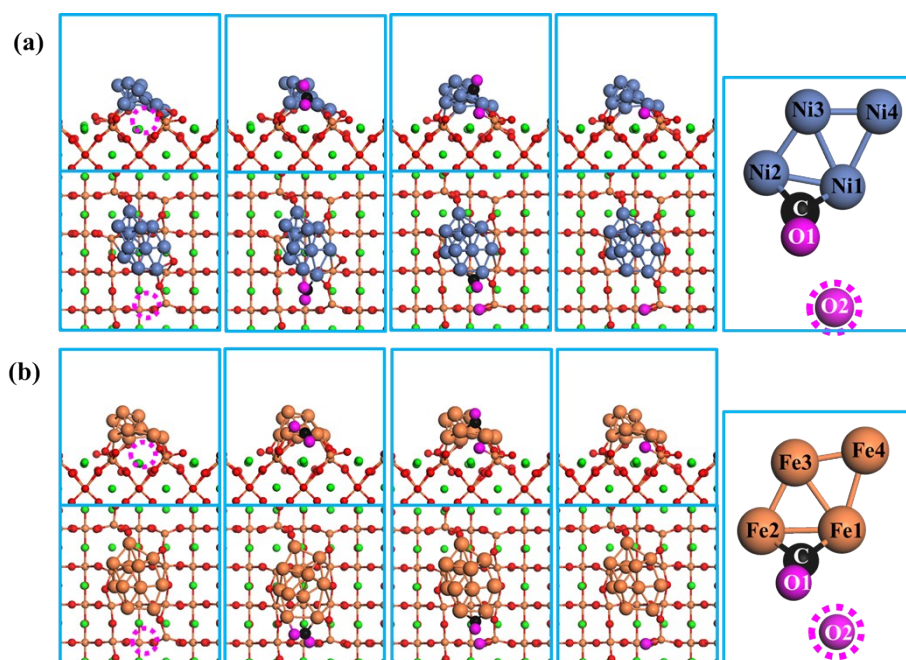

**Figure S11.** DFT calculation results. Optimized geometry structures of the CO<sub>2</sub>RR to CO process including amplified CO\* intermediates (right panels) over two kinds of boundary interfaces (a) Ni@SFO and (b) Fe@SFO.

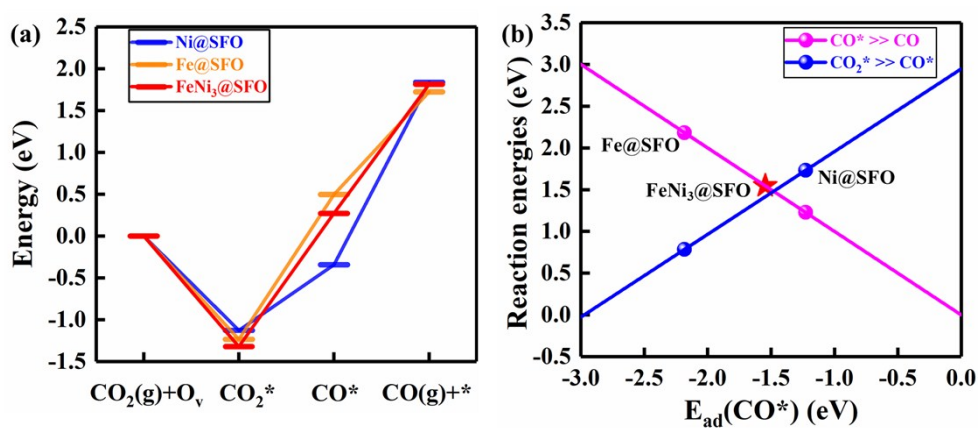

**Figure S12.** DFT calculation results. (a) Potential energy diagram of the  $\text{CO}_2\text{RR}$  to  $\text{CO}$  process over different boundary interfaces. \* represents surface adsorption site and  $\text{O}_v$  denotes the surface with oxygen vacancy. (b) Fitted  $\text{CO}^*$  desorption ( $\text{CO}^*$  to  $\text{CO}$ ) and  $\text{CO}_2^*$  activation ( $\text{CO}_2$  to  $\text{CO}^*$ ) trends over all three clusters.

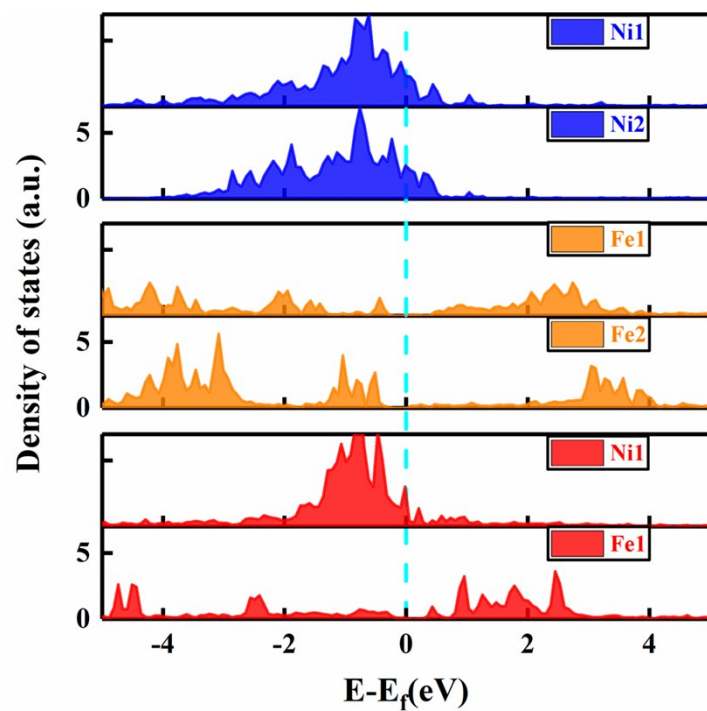

**Figure S13.** DFT calculation results. The d-projected DOS of active Ni or Fe at the interfaces of Ni@SFO, Fe@SFO and FeNi<sub>3</sub>@SFO.

**Table S1.** The stability and formation energies of oxygen vacancy of SMO (0 2 2) plane.

| $N_{Ov}$ | $E_{vac}/eV$ | $E_{pri}/eV$ | $E_{ov}/eV$ |
|----------|--------------|--------------|-------------|
| 1        | -291.75      | -300.42      | 1.20        |

Firstly, we explored a stable O-terminated SMO (0 2 2) surface in the same method with SFO (0 2 2) models. Next, the formation energies of oxygen vacancy is calculated by the formula:  $E_{Ov} = E_{vac} + E_{H_2O} - E_{pri} - E_{H_2}$ , where  $E_{H_2O}$  and  $E_{H_2}$  are the energies of  $H_2O$  and  $H_2$  in gas phase, respectively.. Therefore, we deduce that Mo atom is easily bonded to oxygen atoms because the formation energies of oxygen vacancy is that high through hydrogen reduction.

**Table S2.** Comparison of the stability of two kinds of termination planes for SFO (0 2 2) plane.

| <i>Stoichiometry</i> |           |           |          | $E_t$     | $A$            | $\gamma$          |
|----------------------|-----------|-----------|----------|-----------|----------------|-------------------|
| <i>unit</i>          | <i>Sr</i> | <i>Fe</i> | <i>O</i> | <i>eV</i> | $\text{\AA}^2$ | $eV/\text{\AA}^2$ |
| bulk                 | 1         | 1         | 3        | -32.93    | N/A            | N/A               |
| (0 2 2)-1            | 3         | 3         | 9        | -93.78    | 21.08          | 0.24              |
| (0 2 2)-2            |           |           |          | -92.84    |                | 0.28              |

Here, (1) *Stoichiometry* gives the ratio of Sr, Fe and O atoms in supercell. (2)  $E_t$  is the total energy from DFT calculations. (3)  $A$  is the surface area calculated by  $a \times b$  ( $a$  and  $b$  refer to the lattice parameters). (4)  $\gamma$  is the surface energy, which obtained by the formula :  $\gamma = \frac{1}{A}(E_{surf} - NE_{bulk})$ , where  $N$  is the number of Fe in (0 2 2) plane models. And the smaller the  $\gamma$  value, the more stable the model.

**Table S3.** The formation energies of oxygen vacancy for different models.

|                        | $N_{Ov}$ | $E_{vac}/eV$ | $E_{pri}/eV$ | $E_{ov}/eV$ |
|------------------------|----------|--------------|--------------|-------------|
| SFO                    | 1        | -722.90      | -729.92      | -0.45       |
| Ni@SFO                 | 1        | -772.50      | -778.86      | -1.11       |
| Fe@SFO                 | 1        | -776.40      | -781.23      | -1.00       |
| FeNi <sub>3</sub> @SFO | 1        | -774.29      | -780.67      | -1.09       |

Here, (1)  $N_{Ov}$  is the number of oxygen vacancies in supercell. (2)  $E_{vac}$  is the total energy of the oxygen-defected models. (3)  $E_{pri}$  is the total energy of the pristine models referred to the oxygen-defected models. (4)  $E_{ov}$  is the formation energies of oxygen vacancy, which were calculated as  $E_{ov} = E_{vac} + E_{H_2O} - E_{pri} - E_{H_2}$ , where  $E_{H_2O}$  and  $E_{H_2}$  are the energies of H<sub>2</sub>O and H<sub>2</sub> in gas phase, respectively.

**Table S4.** XPS analysis of Ni 2*p* for SFMN and FeNi<sub>3</sub>@SFMN samples.

| Sample                  | B.E. Ni 2 <i>p</i> <sub>3/2</sub> (eV) |                  | Ni <sup>0</sup> (at.%) | Ni <sup>2+</sup> (at.%) |
|-------------------------|----------------------------------------|------------------|------------------------|-------------------------|
|                         | Ni <sup>0</sup>                        | Ni <sup>2+</sup> |                        |                         |
| SFMN                    |                                        | 854.4/855.9      | 0                      | 100                     |
| FeNi <sub>3</sub> @SFMN | 852.5/857.8                            | 854.5/856.0      | 47.97                  | 52.03                   |

**Table S5.** XPS analysis of Fe 2*p* for SFMN and FeNi<sub>3</sub>@SFMN samples.

| Sample                  | B.E. Fe 2 <i>p</i> <sub>3/2</sub> (eV) |                  |                  | Fe <sup>0</sup> (at.%) | Fe <sup>2+</sup> (at.%) | Fe <sup>3+</sup> (at.%) |
|-------------------------|----------------------------------------|------------------|------------------|------------------------|-------------------------|-------------------------|
|                         | Fe <sup>0</sup>                        | Fe <sup>2+</sup> | Fe <sup>3+</sup> |                        |                         |                         |
| SFMN                    | 709.6                                  | 711.4            |                  | 0                      | 50.13                   | 49.87                   |
| FeNi <sub>3</sub> @SFMN | 704.5                                  | 710.2            | 711.7            | 3.30                   | 58.98                   | 37.72                   |

**Table S6.** XPS analysis of Mo 3d for SFMN and FeNi<sub>3</sub>@SFMN samples.

| Sample                  | B.E. Mo 3d <sub>5/2</sub> (eV) |                  | Mo <sup>5+</sup> (at.%) | Mo <sup>6+</sup> (at.%) |
|-------------------------|--------------------------------|------------------|-------------------------|-------------------------|
|                         | Mo <sup>5+</sup>               | Mo <sup>6+</sup> |                         |                         |
| SFMN                    |                                | 232.0/235.1      | 0                       | 100                     |
| FeNi <sub>3</sub> @SFMN | 231.7/234.7                    | 232.8/235.9      | 6.45                    | 93.55                   |

**Table S7.** XPS analysis of O 1s for SFMN and FeNi<sub>3</sub>@SFMN samples.

| Sample                  | B.E. O 1s (eV)    |                   | O <sub>lat.</sub> (at.%) | O <sub>ads.</sub> (at.%) |
|-------------------------|-------------------|-------------------|--------------------------|--------------------------|
|                         | O <sub>lat.</sub> | O <sub>ads.</sub> |                          |                          |
| SFMN                    | 528.7             | 530.9/532.1       | 42.31                    | 57.69                    |
| FeNi <sub>3</sub> @SFMN | 529.5             | 531.0/532.2       | 44.21                    | 55.79                    |

**Table S8.** The models of SFO (0 2 2) surface and interface.

| Stoichiometry          |           |           |          |           | $E_t$     |
|------------------------|-----------|-----------|----------|-----------|-----------|
| <i>unit</i>            | <i>Sr</i> | <i>Fe</i> | <i>O</i> | <i>Ni</i> | <i>eV</i> |
| SFO                    | 24        | 24        | 72       | N/A       | -729.92   |
| Ni@SFO                 | 24        | 24        | 72       | 11        | -778.86   |
| Fe@SFO                 | 24        | 35        | 72       | N/A       | -782.88   |
| FeNi <sub>3</sub> @SFO | 24        | 26        | 72       | 9         | -780.67   |
